# Supplementary material for: Unusual quadruple bonds featuring collective interaction-type σ bonds between first octal-row atoms in the alkaline-earth compounds AeOLi 2 (Ae = Be–Ba)
Source: Royal Society of Chemistry journal article supplement (doi:10.1039/d4sc01979b), 2024-01-01
Supplement: d4sc01979b1.pdf [file d4sc01979b1.pdf]

# Supporting Information For

## Unusual Quadruple Bonds Featuring Collective Interaction- Type $\sigma$ Bonds Between First Octal-Row Atoms in the Alkaline-Earth Compounds $\text{Ae}\equiv\equiv\text{OLi}_2$ (Ae = Be – Ba)

Li-juan Cui,<sup>a#</sup> Yu-qian Liu,<sup>a#</sup> Sudip Pan,<sup>\*a</sup> Zhong-hua Cui<sup>\*a,b</sup> and Gernot Frenking<sup>\*c,d</sup>

<sup>a</sup>*Institute of Atomic and Molecular Physics, Jilin University, Changchun 130023, China*

*E-mail: zcui@jlu.edu.cn (ZC); sudip@jlu.edu.cn (SP)*

<sup>b</sup>*Key Laboratory of Physics and Technology for Advanced Batteries (Ministry of Education), Jilin University, Changchun 130023, China*

<sup>c</sup>*Philipps-Universität Marburg, Hans-Meerwein-Strasse 4, D-35043 Marburg, Germany*

<sup>d</sup>*Institute of Advanced Synthesis, School of Chemistry and Molecular Engineering, Nanjing Tech University, Nanjing 211816, China.*

*E-mail: frenking@chemie.uni-marburg.de*

<sup>#</sup>These authors contributed equally to this work.

**Figures S1 – S5**

**Tables S1 – S8**

**Table S1.** Calculated vibrational frequencies  $\nu$  ( $\text{cm}^{-1}$ ) of  $\text{AeOLi}_2$  (Ae = Be, Mg, Ca, Sr, Ba) at CCSD(T) and BP86-D3(BJ) using the def2-QZVPP basis set. Vibrational intensities ( $\text{km/mol}$ ) are given in parentheses.<sup>a</sup>

| Mode                          | BeOLi <sub>2</sub> | MgOLi <sub>2</sub> | CaOLi <sub>2</sub> | SrOLi <sub>2</sub> | BaOLi <sub>2</sub> |
|-------------------------------|--------------------|--------------------|--------------------|--------------------|--------------------|
|                               | BP86-D3(BJ)        |                    |                    |                    |                    |
| Li-O-Li out-of-plane bending  | 75.1 (5)           | 110.6 (26)         | 98.8 (1)           | 102.9 (1)          | 96.1 (2)           |
| Li-O-Li in-plane bending      | 193.3 (37)         | 168.2 (38)         | 172.5 (6)          | 165.7 (5)          | 160.6 (2)          |
| Li-O-Be bending               | 242.0 (326)        | 120.7 (153)        | 159.6 (106)        | 148.2 (89)         | 156.7 (58)         |
| Li-O-Li symmetric stretching  | 606.9 (3)          | 685.0 (4)          | 665.4 (3)          | 668.2 (2)          | 650.1 (9)          |
| Li-O-Li asymmetric stretching | 749.9 (1)          | 840.2 (1)          | 784.3 (34)         | 790.4 (40)         | 755.2 (68)         |
| Be-O stretching               | 1102.8 (4)         | 518.2 (0)          | 506.0 (19)         | 421.0 (17)         | 405.6 (32)         |
| CCSD(T)                       |                    |                    |                    |                    |                    |
| Li-O-Li out-of-plane bending  | 84.9               | 124.8              | 116.8              | 115.4              | 102.3              |
| Li-O-Li in-plane bending      | 204.6              | 186.7              | 185.2              | 174.8              | 174.3              |
| Li-O-Be bending               | 241.0              | 106.4              | 131.8              | 135.8              | 156.5              |
| Li-O-Li symmetric stretching  | 630.0              | 705.9              | 697.1              | 690.2              | 670.5              |
| Li-O-Li asymmetric stretching | 787.0              | 868.5              | 836.0              | 832.6              | 791.2              |
| Be-O stretching               | 1114.8             | 557.3              | 487.7              | 413.0              | 404.0              |

<sup>a</sup> IR intensities at CCSD(T) are not available in the Gaussian program.

**Table S2.** The EDA results of the singlet state of BeOLi<sub>2</sub> cluster considering Be and OLi<sub>2</sub> in different charge and electronic states as interacting fragments at the BP86-D3(BJ)/TZ2P-ZORA level.

| Energy                     | Be (2s <sup>2</sup> , S) +<br>OLi <sub>2</sub> (S) | Be (2s <sup>1</sup> 2p <sub>x</sub> <sup>1</sup> , T) +<br>OLi <sub>2</sub> (T) | Be <sup>+</sup> (2s <sup>1</sup> , D) +<br>OLi <sub>2</sub> <sup>-</sup> (D) | Be <sup>2+</sup> (2s <sup>0</sup> , S) +<br>OLi <sub>2</sub> <sup>2-</sup> (S) |
|----------------------------|----------------------------------------------------|---------------------------------------------------------------------------------|------------------------------------------------------------------------------|--------------------------------------------------------------------------------|
| $\Delta E_{\text{int}}$    | -81.0                                              | -189.0                                                                          | -287.5                                                                       | -778.5                                                                         |
| $\Delta E_{\text{Pauli}}$  | 253.1                                              | 148.0                                                                           | 173.2                                                                        | 80.6                                                                           |
| $\Delta E_{\text{disp}}$   | -1.7                                               | -1.7                                                                            | -1.7                                                                         | -1.7                                                                           |
| $\Delta E_{\text{elstat}}$ | -189.0                                             | -119.5                                                                          | -266.8                                                                       | -511.7                                                                         |
| $\Delta E_{\text{orb}}$    | -143.4                                             | -215.8                                                                          | -192.2                                                                       | -345.7                                                                         |

**Table S3.** The EDA results of the singlet state of MgOLi<sub>2</sub> cluster considering Mg and OLi<sub>2</sub> in different charge and electronic states as interacting fragments at the BP86-D3(BJ)/TZ2P-ZORA level.

| Energy                     | Mg (3s <sup>2</sup> , S) +<br>OLi <sub>2</sub> (S) | Mg (3s <sup>1</sup> 3p <sub>x</sub> <sup>1</sup> , T) +<br>OLi <sub>2</sub> (T) | Mg <sup>+</sup> (3s <sup>1</sup> , D) +<br>OLi <sub>2</sub> <sup>-</sup> (D) | Mg <sup>2+</sup> (3s <sup>0</sup> , S) +<br>OLi <sub>2</sub> <sup>2-</sup> (S) |
|----------------------------|----------------------------------------------------|---------------------------------------------------------------------------------|------------------------------------------------------------------------------|--------------------------------------------------------------------------------|
| $\Delta E_{\text{int}}$    | -40.2                                              | -169.6                                                                          | -214.5                                                                       | -634.0                                                                         |
| $\Delta E_{\text{Pauli}}$  | 130.8                                              | 81.0                                                                            | 93.6                                                                         | 57.8                                                                           |
| $\Delta E_{\text{disp}}$   | -2.4                                               | -2.4                                                                            | -2.4                                                                         | -2.4                                                                           |
| $\Delta E_{\text{elstat}}$ | -114.2                                             | -76.3                                                                           | -207.8                                                                       | -463.2                                                                         |
| $\Delta E_{\text{orb}}$    | -54.4                                              | -171.8                                                                          | -97.9                                                                        | -226.2                                                                         |

**Table S4.** The EDA results of the singlet state of CaOLi<sub>2</sub> cluster considering Ca and OLi<sub>2</sub> in different charge and electronic states as interacting fragments at the BP86-D3(BJ)/TZ2P-ZORA level.

| Energy                     | Ca (4s <sup>2</sup> , S) +<br>OLi <sub>2</sub> (S)                             | Ca <sup>+</sup> (4s <sup>1</sup> , D) +<br>OLi <sub>2</sub> <sup>-</sup> (D) | Ca (4s <sup>1</sup> 3d <sup>z<sup>2</sup></sup> <sup>1</sup> , T)<br>+ OLi <sub>2</sub> (T) | Ca (4s <sup>1</sup> 3d <sub>yz</sub> <sup>1</sup> , T)<br>+ OLi <sub>2</sub> (T) |
|----------------------------|--------------------------------------------------------------------------------|------------------------------------------------------------------------------|---------------------------------------------------------------------------------------------|----------------------------------------------------------------------------------|
| $\Delta E_{\text{int}}$    | -60.9                                                                          | -199.8                                                                       | -164.2                                                                                      | -157.2                                                                           |
| $\Delta E_{\text{Pauli}}$  | 137.8                                                                          | 116.4                                                                        | 101.7                                                                                       | 86.4                                                                             |
| $\Delta E_{\text{disp}}$   | -2.7                                                                           | -2.7                                                                         | -2.7                                                                                        | -2.7                                                                             |
| $\Delta E_{\text{elstat}}$ | -126.9                                                                         | -214.4                                                                       | -71.0                                                                                       | -76.0                                                                            |
| $\Delta E_{\text{orb}}$    | -69.2                                                                          | -99.2                                                                        | -192.2                                                                                      | -164.9                                                                           |
| Energy                     | Ca <sup>2+</sup> (4s <sup>0</sup> , D) +<br>OLi <sub>2</sub> <sup>2-</sup> (D) |                                                                              |                                                                                             |                                                                                  |
| $\Delta E_{\text{int}}$    | -544.7                                                                         |                                                                              |                                                                                             |                                                                                  |
| $\Delta E_{\text{Pauli}}$  | 98.7                                                                           |                                                                              |                                                                                             |                                                                                  |
| $\Delta E_{\text{disp}}$   | -2.7                                                                           |                                                                              |                                                                                             |                                                                                  |
| $\Delta E_{\text{elstat}}$ | -455.4                                                                         |                                                                              |                                                                                             |                                                                                  |
| $\Delta E_{\text{orb}}$    | -185.3                                                                         |                                                                              |                                                                                             |                                                                                  |

**Table S5.** The EDA results of the singlet state of SrOLi<sub>2</sub> cluster considering Sr and OLi<sub>2</sub> in different charge and electronic states as interacting fragments at the BP86-D3(BJ)/TZ2P-ZORA level.

| Energy                     | Sr (5s <sup>2</sup> , S) +<br>OLi <sub>2</sub> (S)                             | Sr <sup>+</sup> (5s <sup>1</sup> , D) +<br>OLi <sub>2</sub> <sup>-</sup> (D) | Sr (5s <sup>1</sup> 4d <sub>yz</sub> <sup>1</sup> , T)<br>+ OLi <sub>2</sub> (T) | Sr (5s <sup>1</sup> 4 <sup>d</sup> <sub>z<sup>2</sup></sub> <sup>1</sup> , T)<br>+ OLi <sub>2</sub> (T) |
|----------------------------|--------------------------------------------------------------------------------|------------------------------------------------------------------------------|----------------------------------------------------------------------------------|---------------------------------------------------------------------------------------------------------|
| $\Delta E_{\text{int}}$    | -55.2                                                                          | -185.0                                                                       | -181.1                                                                           | -165.6                                                                                                  |
| $\Delta E_{\text{Pauli}}$  | 131.5                                                                          | 116.3                                                                        | 93.3                                                                             | 100.4                                                                                                   |
| $\Delta E_{\text{disp}}$   | -2.7                                                                           | -2.7                                                                         | -2.7                                                                             | -2.7                                                                                                    |
| $\Delta E_{\text{elstat}}$ | -121.4                                                                         | -208.9                                                                       | -78.4                                                                            | -71.2                                                                                                   |
| $\Delta E_{\text{orb}}$    | -62.6                                                                          | -89.7                                                                        | -193.2                                                                           | -192.0                                                                                                  |
| Energy                     | Sr <sup>2+</sup> (5s <sup>0</sup> , S) +<br>OLi <sub>2</sub> <sup>2-</sup> (S) |                                                                              |                                                                                  |                                                                                                         |
| $\Delta E_{\text{int}}$    | -511.1                                                                         |                                                                              |                                                                                  |                                                                                                         |
| $\Delta E_{\text{Pauli}}$  | 106.9                                                                          |                                                                              |                                                                                  |                                                                                                         |
| $\Delta E_{\text{disp}}$   | -2.7                                                                           |                                                                              |                                                                                  |                                                                                                         |
| $\Delta E_{\text{elstat}}$ | -447.7                                                                         |                                                                              |                                                                                  |                                                                                                         |
| $\Delta E_{\text{orb}}$    | -167.6                                                                         |                                                                              |                                                                                  |                                                                                                         |

**Table S6.** The EDA results of the singlet state of BaOLi<sub>2</sub> cluster considering Ba and OLi<sub>2</sub> in different charge and electronic states as interacting fragments at the BP86-D3(BJ)/TZ2P-ZORA level.

| Energy                     | Ba (6s <sup>2</sup> , S) +<br>OLi <sub>2</sub> (S)                             | Ba <sup>+</sup> (6s <sup>1</sup> , D) +<br>OLi <sub>2</sub> <sup>-</sup> (D) | Ba (6s <sup>1</sup> 5d <sub>yz</sub> <sup>1</sup> , T)<br>+ OLi <sub>2</sub> (T) | Ba (6s <sup>1</sup> 5 <sup>d</sup> <sub>z<sup>2</sup></sub> , T)<br>+ OLi <sub>2</sub> (T) |
|----------------------------|--------------------------------------------------------------------------------|------------------------------------------------------------------------------|----------------------------------------------------------------------------------|--------------------------------------------------------------------------------------------|
| $\Delta E_{\text{int}}$    | -65.0                                                                          | -183.0                                                                       | -152.8                                                                           | -137.6                                                                                     |
| $\Delta E_{\text{Pauli}}$  | 155.9                                                                          | 147.4                                                                        | 126.1                                                                            | 133.2                                                                                      |
| $\Delta E_{\text{disp}}$   | -2.8                                                                           | -2.8                                                                         | -2.8                                                                             | -2.8                                                                                       |
| $\Delta E_{\text{elstat}}$ | -138.7                                                                         | -225.6                                                                       | -102.6                                                                           | -88.4                                                                                      |
| $\Delta E_{\text{orb}}$    | -79.4                                                                          | -102.1                                                                       | -173.4                                                                           | -179.6                                                                                     |
| Energy                     | Ba <sup>2+</sup> (6s <sup>0</sup> , S) +<br>OLi <sub>2</sub> <sup>2-</sup> (S) |                                                                              |                                                                                  |                                                                                            |
| $\Delta E_{\text{int}}$    | -485.3                                                                         |                                                                              |                                                                                  |                                                                                            |
| $\Delta E_{\text{Pauli}}$  | 145.8                                                                          |                                                                              |                                                                                  |                                                                                            |
| $\Delta E_{\text{disp}}$   | -2.8                                                                           |                                                                              |                                                                                  |                                                                                            |
| $\Delta E_{\text{elstat}}$ | -460.2                                                                         |                                                                              |                                                                                  |                                                                                            |
| $\Delta E_{\text{orb}}$    | -168.1                                                                         |                                                                              |                                                                                  |                                                                                            |

**Table S7.** Coordinates of singlet AeOLi<sub>2</sub> calculated at BP86-D3(BJ)/def2-QZVPP.

|                    |                |                 |                 |
|--------------------|----------------|-----------------|-----------------|
| BeOLi <sub>2</sub> |                |                 |                 |
| Be                 | 0.000000000000 | 0.000000000000  | -1.212868000000 |
| O                  | 0.000000000000 | 0.000000000000  | 0.226749000000  |
| Li                 | 0.000000000000 | 1.713602000000  | 0.506246000000  |
| Li                 | 0.000000000000 | -1.713602000000 | 0.506246000000  |
| MgOLi <sub>2</sub> |                |                 |                 |
| Mg                 | 0.000000000000 | 0.000000000000  | 1.146900000000  |
| O                  | 0.000000000000 | 0.000000000000  | -0.758933000000 |
| Li                 | 0.000000000000 | 1.605234000000  | -1.281891000000 |
| Li                 | 0.000000000000 | -1.605234000000 | -1.281891000000 |
| CaOLi <sub>2</sub> |                |                 |                 |
| Ca                 | 0.000000000000 | 0.000000000000  | 0.941164000000  |
| O                  | 0.000000000000 | 0.000000000000  | -1.083554000000 |
| Li                 | 0.000000000000 | 1.594847000000  | -1.692474000000 |
| Li                 | 0.000000000000 | -1.594847000000 | -1.692474000000 |
| SrOLi <sub>2</sub> |                |                 |                 |
| Sr                 | 0.000000000000 | 0.000000000000  | 0.660118000000  |
| O                  | 0.000000000000 | 0.000000000000  | -1.514636000000 |
| Li                 | 0.000000000000 | 1.575581000000  | -2.161235000000 |
| Li                 | 0.000000000000 | -1.575581000000 | -2.161235000000 |
| BaOLi <sub>2</sub> |                |                 |                 |
| Ba                 | 0.000000000000 | 0.000000000000  | 0.512031000000  |
| O                  | 0.000000000000 | 0.000000000000  | -1.747656000000 |
| Li                 | 0.000000000000 | 1.566599000000  | -2.448749000000 |
| Li                 | 0.000000000000 | -1.566599000000 | -2.448749000000 |



**Table S8.** Coordinates of singlet AeOLi<sub>2</sub> calculated at CCSD(T)/def2-QZVPP.

|                    |                |                 |                 |
|--------------------|----------------|-----------------|-----------------|
| BeOLi <sub>2</sub> |                |                 |                 |
| Be                 | 0.000000000000 | 0.000000000000  | -1.202750000000 |
| O                  | 0.000000000000 | 0.000000000000  | 0.236092000000  |
| Li                 | 0.000000000000 | 1.707308000000  | 0.487043000000  |
| Li                 | 0.000000000000 | -1.707308000000 | 0.487043000000  |
| MgOLi <sub>2</sub> |                |                 |                 |
| Mg                 | 0.000000000000 | 0.000000000000  | 1.124803000000  |
| O                  | 0.000000000000 | 0.000000000000  | -0.756369000000 |
| Li                 | 0.000000000000 | 1.611745000000  | -1.241114000000 |
| Li                 | 0.000000000000 | -1.611745000000 | -1.241114000000 |
| CaOLi <sub>2</sub> |                |                 |                 |
| Ca                 | 0.000000000000 | 0.000000000000  | 0.953293000000  |
| O                  | 0.000000000000 | 0.000000000000  | -1.114014000000 |
| Li                 | 0.000000000000 | 1.589134000000  | -1.692292000000 |
| Li                 | 0.000000000000 | -1.589134000000 | -1.692292000000 |
| SrOLi <sub>2</sub> |                |                 |                 |
| Sr                 | 0.000000000000 | 0.000000000000  | 0.663742000000  |
| O                  | 0.000000000000 | 0.000000000000  | -1.537781000000 |
| Li                 | 0.000000000000 | 1.574796000000  | -2.153324000000 |
| Li                 | 0.000000000000 | -1.574796000000 | -2.153324000000 |
| BaOLi <sub>2</sub> |                |                 |                 |
| Ba                 | 0.000000000000 | 0.000000000000  | 0.509631000000  |
| O                  | 0.000000000000 | 0.000000000000  | -1.756815000000 |
| Li                 | 0.000000000000 | 1.574432000000  | -2.414132000000 |
| Li                 | 0.000000000000 | -1.574432000000 | -2.414132000000 |

|                    | Deformation density                                                                                                                                         |                                                                                                                 | Orbital                                                                                                                                                                                                                  |                                                                                                                                                                                                                            |
|--------------------|-------------------------------------------------------------------------------------------------------------------------------------------------------------|-----------------------------------------------------------------------------------------------------------------|--------------------------------------------------------------------------------------------------------------------------------------------------------------------------------------------------------------------------|----------------------------------------------------------------------------------------------------------------------------------------------------------------------------------------------------------------------------|
|                    | MgOLi <sub>2</sub>                                                                                                                                          | Mg                                                                                                              | OLi <sub>2</sub>                                                                                                                                                                                                         |                                                                                                                                                                                                                            |
| $\Delta\rho_{(1)}$ | 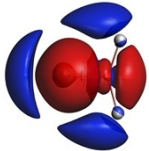<br>$\Delta E_{\text{orb}(1)} = -35.8 \text{ kcal/mol}$<br>$ v_1  = 0.66$  | <br>HOMO<br>$ v_1  = 0.66$     | <br>$3s \ v = -0.49$<br><br>$3p_{\sigma} \ v = 0.11$ | <br>LUMO<br>$v = 0.27$<br><br>LUMO+2<br>$v = 0.10$   |
| $\Delta\rho_{(2)}$ | <br>$\Delta E_{\text{orb}(2)} = -7.0 \text{ kcal/mol}$<br>$ v_2  = 0.27$  | <br>HOMO-3<br>$ v_2  = 0.27$  | <br>$3s \ v = 0.07$<br><br>$3p_{\sigma} \ v = 0.03$ | <br>HOMO-1<br>$v = -0.11$<br><br>LUMO<br>$v = 0.02$ |
| $\Delta\rho_{(3)}$ | <br>$\Delta E_{\text{orb}(3)} = -5.9 \text{ kcal/mol}$<br>$ v_3  = 0.23$ | <br>HOMO-1<br>$ v_3  = 0.23$ | <br>$3p_{\pi} \ v = 0.06$                                                                                                            | <br>HOMO<br>$v = -0.10$                                                                                                               |
| $\Delta\rho_{(4)}$ | <br>$\Delta E_{\text{orb}(4)} = -4.9 \text{ kcal/mol}$<br>$ v_4  = 0.16$ | <br>HOMO-2<br>$ v_4  = 0.16$ | <br>$3p_{\pi'} \ v = 0.04$                                                                                                           | <br>HOMO-2<br>$v = -0.07$                                                                                                             |

**Figure S1.** Plot of the deformation densities,  $\Delta\rho_{(1)-(4)}$  shown as the sum of  $\alpha$  and  $\beta$  electronic charge corresponding to  $\Delta E_{\text{orb}(1)-(4)}$  and the related interacting orbitals in the singlet states of MgOLi<sub>2</sub> at the BP86-D3(BJ)/TZ2P-ZORA level using Mg ( $3s^2$ , S) + OLi<sub>2</sub> (S) as interacting fragments. The eigenvalues  $v$  indicate the size of the charge flow, and the direction of charge flow is red  $\rightarrow$  blue. The isovalue for  $\Delta\rho_{(1)-(4)}$  is 0.001 au.

|                    | Deformation density                                                                                                                                         |                                                                                                                 | Orbital                                                                                                             |                                                                                                                                                                                                                            |
|--------------------|-------------------------------------------------------------------------------------------------------------------------------------------------------------|-----------------------------------------------------------------------------------------------------------------|---------------------------------------------------------------------------------------------------------------------|----------------------------------------------------------------------------------------------------------------------------------------------------------------------------------------------------------------------------|
|                    | SrOLi <sub>2</sub>                                                                                                                                          | Sr                                                                                                              | OLi <sub>2</sub>                                                                                                    |                                                                                                                                                                                                                            |
| $\Delta\rho_{(1)}$ | 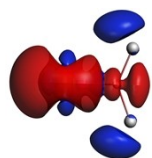<br>$\Delta E_{\text{orb}(1)} = -28.6 \text{ kcal/mol}$<br>$ v_1  = 0.76$  | <br>HOMO<br>$ v_1  = 0.76$     | <br>5s $v = -0.50$                | <br>LUMO<br>$v = 0.36$<br><br>LUMO+2<br>$v = 0.13$   |
| $\Delta\rho_{(2)}$ | <br>$\Delta E_{\text{orb}(2)} = -15.3 \text{ kcal/mol}$<br>$ v_2  = 0.44$ | <br>HOMO-2<br>$ v_2  = 0.44$  | <br>4d <sub>σ</sub> $v = 0.10$   | <br>HOMO-1<br>$v = -0.16$<br><br>LUMO<br>$v = 0.04$ |
| $\Delta\rho_{(3)}$ | <br>$\Delta E_{\text{orb}(3)} = -9.2 \text{ kcal/mol}$<br>$ v_3  = 0.31$ | <br>HOMO-1<br>$ v_3  = 0.31$ | <br>4d <sub>π</sub> $v = 0.09$  | <br>HOMO<br>$v = -0.12$                                                                                                               |
| $\Delta\rho_{(4)}$ | <br>$\Delta E_{\text{orb}(4)} = -7.8 \text{ kcal/mol}$<br>$ v_4  = 0.26$ | <br>HOMO-3<br>$ v_4  = 0.26$ | <br>4d <sub>π'</sub> $v = 0.08$ | <br>HOMO-2<br>$v = -0.09$                                                                                                             |

**Figure S2.** Plot of the deformation densities,  $\Delta\rho_{(1)-(4)}$  shown as the sum of  $\alpha$  and  $\beta$  electronic charge corresponding to  $\Delta E_{\text{orb}(1)-(4)}$  and the related interacting orbitals in the singlet states of SrOLi<sub>2</sub> at the BP86-D3(BJ)/TZ2P-ZORA level using Sr (5s<sup>2</sup>, S) + OLi<sub>2</sub> (S) as interacting fragments. The eigenvalues  $v$  indicate the size of the charge flow, and the direction of charge flow is red  $\rightarrow$  blue. The isovalue for  $\Delta\rho_{(1)-(4)}$  is 0.001 au.

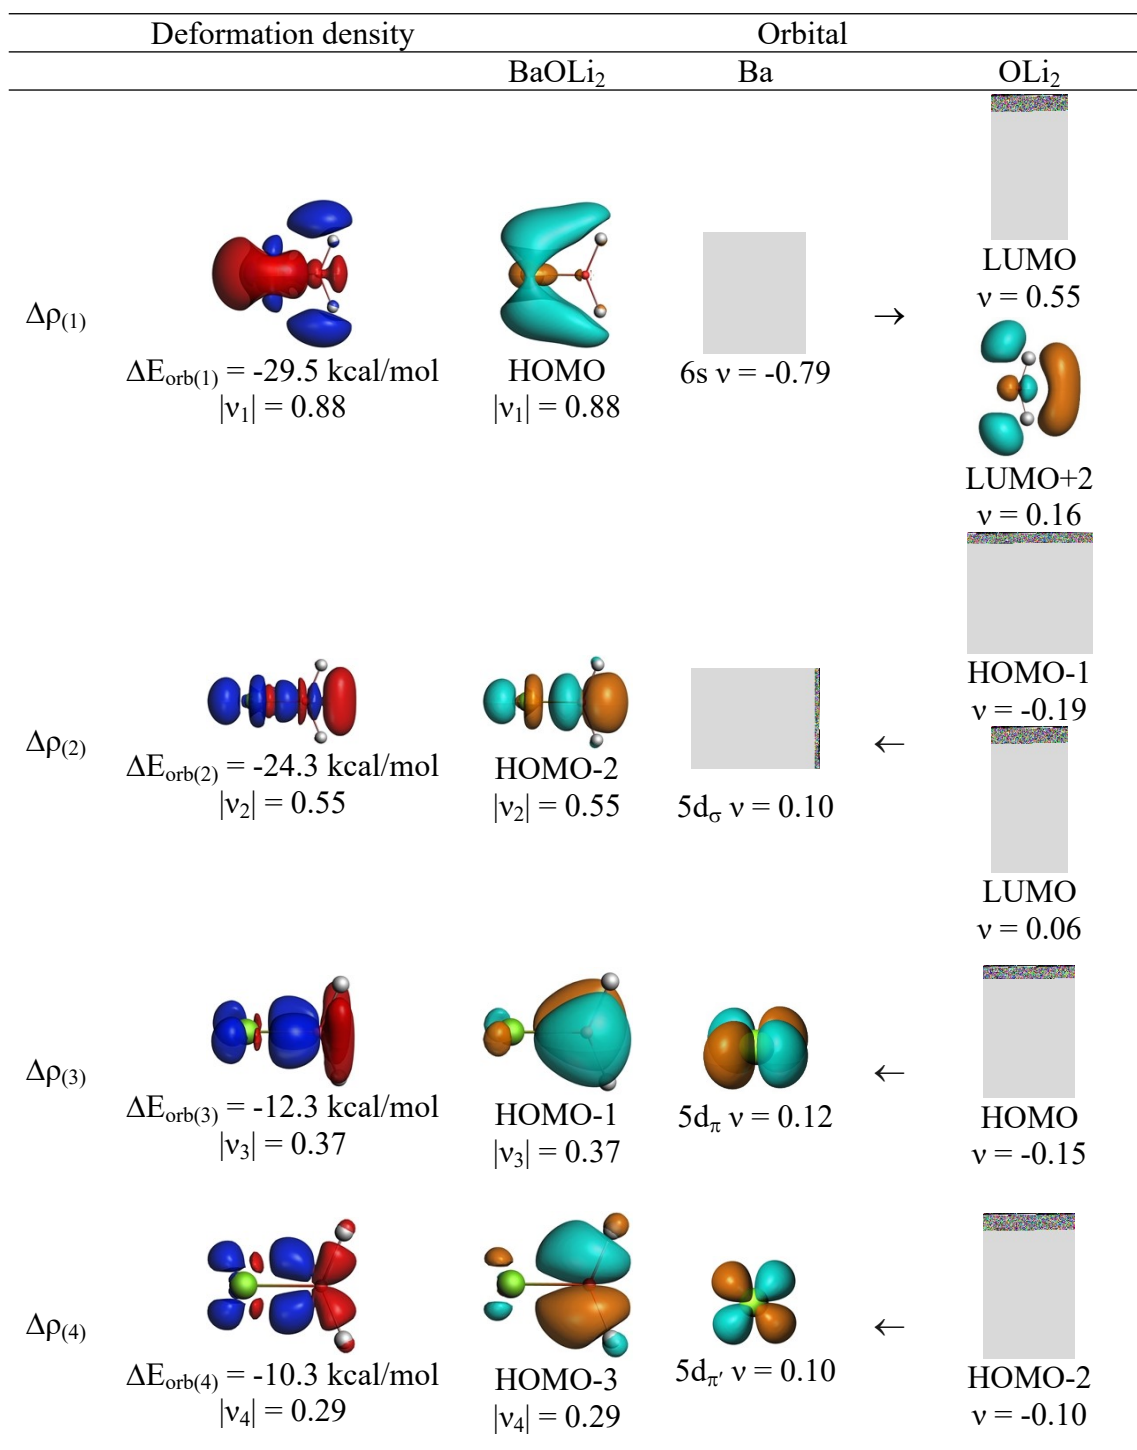

**Figure S3.** Plot of the deformation densities,  $\Delta\rho_{(1)-(4)}$  shown as the sum of  $\alpha$  and  $\beta$  electronic charge corresponding to  $\Delta E_{\text{orb}(1)-(4)}$  and the related interacting orbitals in the singlet states of BaOLi<sub>2</sub> at the BP86-D3(BJ)/TZ2P-ZORA level using Ba (6s<sup>2</sup>, S) + OLi<sub>2</sub> (S) as interacting fragments. The eigenvalues  $v$  indicate the size of the charge flow, and the direction of charge flow is red→blue. The isovalue for  $\Delta\rho_{(1)-(4)}$  is 0.001 au.

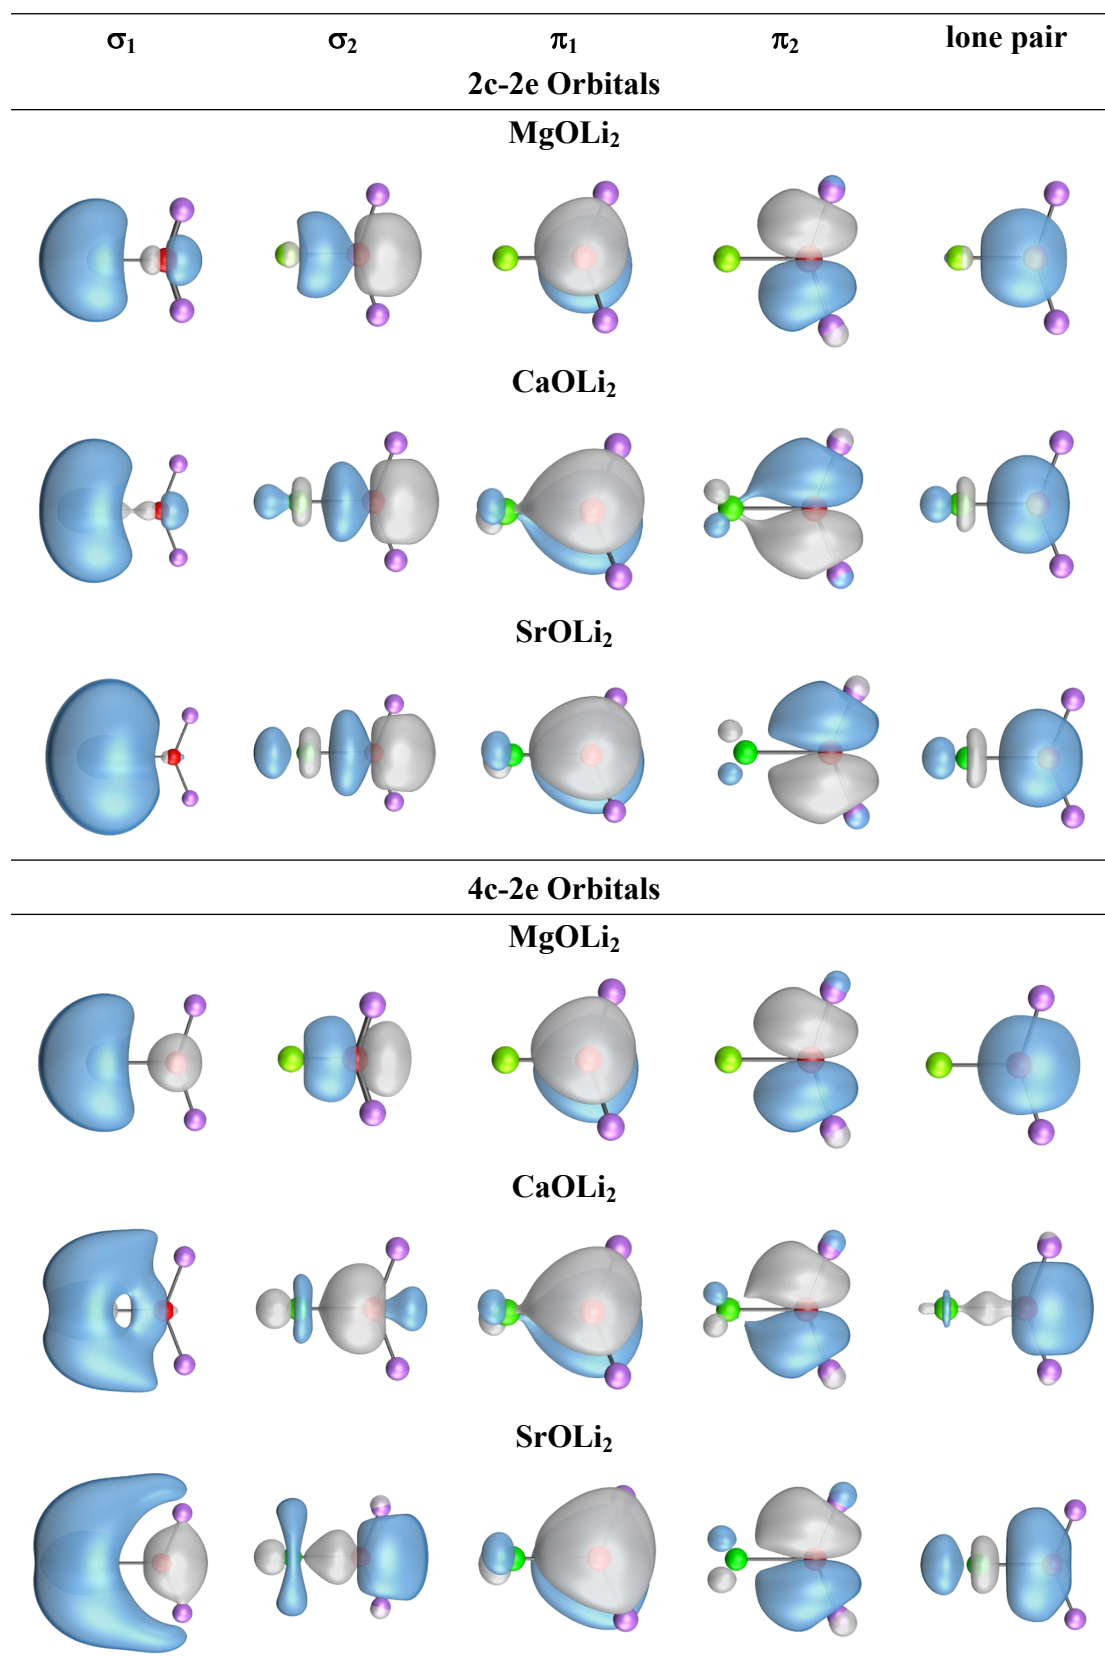

**Figure S4.** Shape of the AdNDP orbitals of MgOLi<sub>2</sub>, CaOLi<sub>2</sub> and SrOLi<sub>2</sub>.

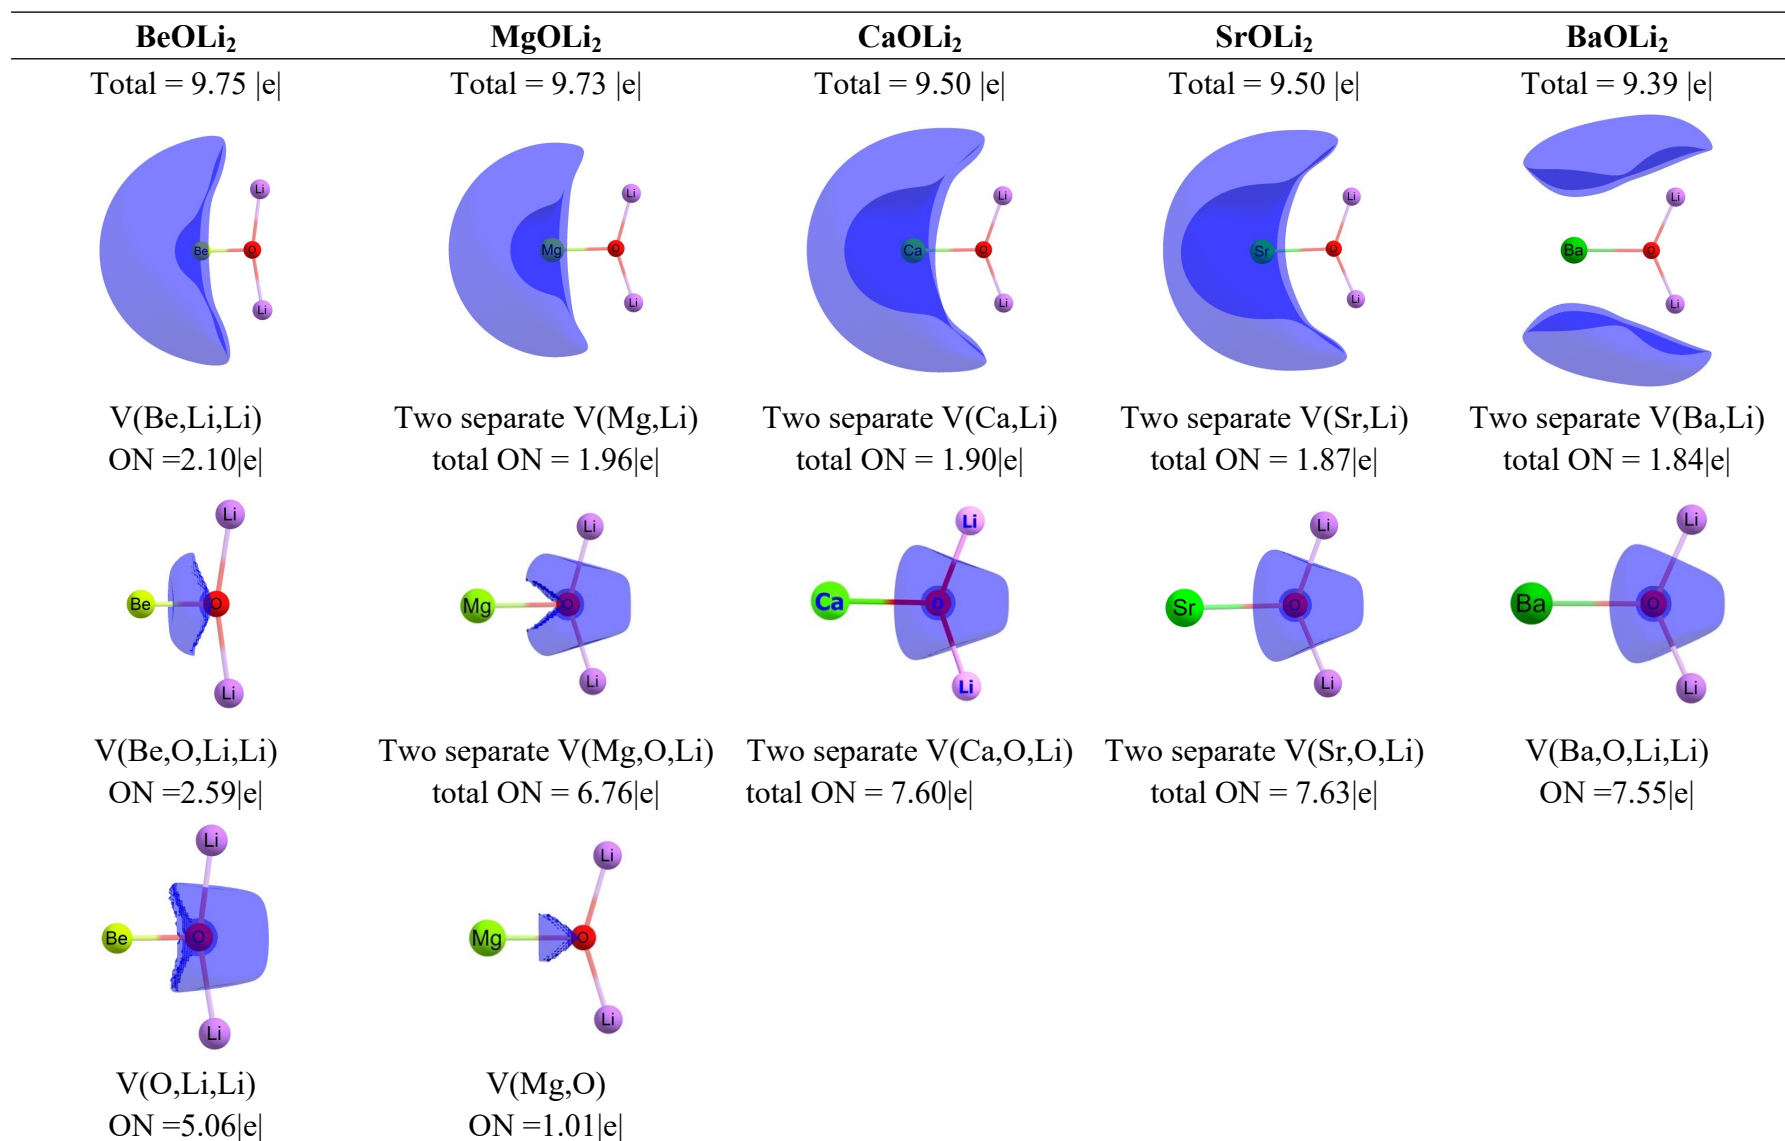

**Figure S5.** ELF calculation showing the synaptic basins and the occupation numbers ON of AeOLi<sub>2</sub> (Ae = Be – Ba) at BP86-D3(BJ)/def2-QZVPP. The contour line diagrams have an isovalue of 0.56e/a.u.
